## **Title: Cardiometabolic Outcomes in Idiopathic Intracranial Hypertension: An International Matched-Cohort Study**

Ahmed Y. Azzam<sup>1</sup>, Muhammed Amir Essibayi<sup>1,2</sup>, Dhruvil Vaishnav<sup>1,2</sup>, Mahmoud M. Morsy<sup>3</sup>, Osman Elamin<sup>4</sup>, Ahmed Saad Al Zomia<sup>5</sup>, Hammam A. Alotaibi<sup>6</sup>, Ahmed Alamoud<sup>5</sup>, Adham A. Mohamed<sup>7</sup>, Omar S. Ahmed<sup>3</sup>, Adam Elswedy<sup>8</sup>, Hana J. Abukhadijah<sup>9</sup>, Oday Atallah<sup>10</sup>, Adam A. Dmytriw<sup>11,12</sup>, David J. Altschul<sup>1,2\*</sup>

- 1- Montefiore-Einstein Cerebrovascular Research Lab, Albert Einstein College of Medicine, Bronx, NY, USA.
- 2- Department of Neurological Surgery, Montefiore Medical Center, Albert Einstein College of Medicine, Bronx, NY, USA.
- 3- October 6 University Hospital, October 6 University, 6<sup>th</sup> of October City, Giza, Egypt.
- 4- Department of Neurosurgery, Jordan Hospital, Amman, Jordan.
- 5- College of Medicine, King Khalid University, Abha, Saudi Arabia
- 6- Ophthalmology Department, Prince Sultan Military Medical City, Riyadh, Saudi Arabia.
- 7- Cairo University Hospitals, Cairo University, Cairo, Egypt.
- 8- Biomedicinskt Centrum BMC, Uppsala University, Husargatan 3, 752 37 Uppsala, Sweden.
- 9- Medical Research Center, Hamad Medical Corporation, Doha, Qatar.
- 10- Department of Neurosurgery, Hannover Medical School, Hannover, Germany.
- 11- Neuroendovascular Program, Massachusetts General Hospital & Brigham and Women's Hospital, Harvard University, Boston, MA, USA
- 12- Neurovascular Centre, Divisions of Therapeutic Neuroradiology & Neurosurgery, St. Michael's Hospital, University of Toronto, Toronto, ON, Canada.

### **Corresponding Author\*:**

David J. Altschul, MD

Department of Neurological Surgery,

Montefiore Medical Center, Albert Einstein College of Medicine,

Bronx, NY, 10467, USA.,

Email Address: [daltschu@montefiore.org](mailto:daltschu@montefiore.org)

## **Declarations:**

**Conflicts of Interest:** N/A.

**IRB Approval:** Waived.

**LLM Statement:** We have employed an advanced Large Language Model (LLM) to enhance and refine the English-language writing. This process focused solely on improving the text's clarity and style, without generating or adding any new information to the content.

**Funding Source:** The project described was supported by the National Center for Advancing Translational Sciences (NCATS), National Institutes of Health, through CTSA award number: UM1TR004400. The content is solely the responsibility of the authors and does not necessarily represent the official views of the NIH.

**Ethical Approvals:** Waived.

**Consent for Participation:** N/A.

**Data Availability Statement:** All used data is available within TriNetX database platform.

## **CRedit Author Statement:**

**Ahmed Y. Azzam:** Methodology, Investigation, Data Curation, Writing - Original Draft, Formal analysis **Muhammed Amir Essibayi:** Investigation, Data Curation, Writing - Original Draft **Dhrumil Vaishnav:** Investigation, Data Curation, Writing - Review & Editing **Mahmoud M. Morsy:** Investigation, Resources, Data Curation **Osman Elamin:** Investigation, Resources, Data Curation **Ahmed Saad Al Zomia:** Investigation, Resources, Data Curation **Hammam A. Alotaibi:** Investigation, Resources, Validation **Ahmed Alamoud:** Investigation, Resources, Data Curation **Adham A. Mohamed:** Investigation, Resources, Data Curation **Omar S. Ahmed:** Investigation, Resources, Data Curation **Adam Elswedy:** Formal analysis, Writing - Review & Editing, Visualization **Hana J. Abukhadijah:** Data Curation, Writing - Review & Editing **Oday Atallah:** Validation, Writing - Review & Editing **Adam A. Dmytriw:** Conceptualization, Methodology, Writing - Review & Editing, Supervision **David J. Altschul:** Conceptualization, Methodology, Project administration, Supervision, Funding acquisition, Writing - Review & Editing

## Abstract:

**Introduction:** Idiopathic intracranial hypertension (IIH) has been traditionally viewed as a neuro-ophthalmic disorder, yet emerging evidence suggests broader systemic implications. Our study investigates the cardiometabolic outcomes associated with IIH through a comprehensive matched-cohort analysis.

**Methods:** We conducted a retrospective analysis of electronic health records from 2009 to 2024. We compared IIH patients with matched controls using propensity score matching based on age, sex, race, ethnicity, and baseline BMI. Cardiovascular and metabolic outcomes were assessed over a ten-year follow-up period, with additional stratified analyses comparing obese and non-obese subgroups.

**Results:** IIH patients demonstrated significantly increased risks of ischemic stroke/TIA (RR 2.515, 95% CI 2.250-2.812) and non-traumatic hemorrhagic stroke (RR 7.744, 95% CI 6.118-9.801). Notable metabolic findings included elevated risks of insulin resistance (RR 1.470, 95% CI 1.258-1.717) and type 2 diabetes mellitus (RR 1.210, 95% CI 1.171-1.250). These associations persisted in non-obese IIH patients, suggesting pathogenic mechanisms independent of adiposity. Additionally, IIH patients showed increased prevalence of polycystic ovarian syndrome (RR 1.470, 95% CI 1.258-1.717) and metabolic syndrome (RR 1.125, 95% CI 1.045-1.205).

**Conclusions:** Our findings highlight IIH as a complex multisystem disorder with significant cardiometabolic implications beyond its traditional neuro-ophthalmic presentation. The findings suggest the need for comprehensive cardiovascular and metabolic screening in IIH patients, regardless of BMI status, and indicate potential novel therapeutic targets for investigation.

**Keywords:** Idiopathic Intracranial Hypertension; Pseudotumor Cerebri; Cardiovascular; Cardiometabolic; Obesity

## 1. Introduction:

Idiopathic intracranial hypertension (IIH) is a neurological disorder characterized by elevated intracranial pressure without an identifiable cause. While traditionally associated with obesity and female sex, recent evidence suggests that IIH has broader systemic implications beyond its well-known neuro-ophthalmic manifestations [1]. The condition has been linked to various metabolic and cardiovascular comorbidities, indicating a complex interplay between intracranial pressure regulation and systemic physiology [2-4]. Despite significant advances in our understanding of IIH, substantial knowledge gaps persist regarding its pathophysiology and systemic associations. Current evidence is limited by the heterogeneity of study populations, inconsistent diagnostic criteria, and a lack of long-term inclusive data [5].

These limitations underscore the need for a more comprehensive approach to elucidate the underlying mechanisms and potential therapeutic targets in IIH. Exploring the systemic correlations between IIH and other disorders is crucial for developing a more nuanced understanding of the disease. By examining these relationships, we may uncover shared pathophysiological pathways, identify novel risk factors, and potentially reveal new avenues for treatment. For instance, recent research has highlighted connections between IIH and endocrine disorders, suggesting a possible role for hormonal dysregulation in its pathogenesis [6].

A landmark study by Adderley et al. provided compelling evidence for the association between IIH and cardiovascular disease (CVD) in women [7]. Their large-scale cohort study, involving 2,760 women with IIH and 27,125 matched controls, demonstrated a twofold increased risk of CVD in IIH patients, including heart failure, ischemic heart disease, and stroke. Notably, this association persisted after adjusting for traditional risk factors, suggesting that IIH may be an independent risk factor for CVD. The study also revealed a higher incidence of type 2 diabetes and hypertension in the IIH group, further emphasizing the systemic nature of the disorder.

Building upon these findings, our study aims to further explore the cardiometabolic associations of IIH. By examining a comprehensive range of metabolic and cardiovascular parameters in a well-characterized cohort of IIH patients, we seek to extend the work of Adderley et al. [7] and provide additional evidence for the systemic implications of IIH. Our research focuses on elucidating potential mechanisms linking IIH to cardiometabolic dysfunction, with the ultimate goal of identifying novel therapeutic targets and improving patient outcomes. Through this investigation, we hope to contribute to a more holistic understanding of IIH as a multisystem disorder rather than a purely neuro-ophthalmic condition.

## 2. Methods:

We leveraged data from the comprehensive TriNetX Research Network, encompassing around 197 million electronic health records to the date from about 160 healthcare organizations around the world, predominantly in the United States [8], but also including Australia, Belgium, Brazil, Bulgaria, Estonia, France, Georgia, Germany, Ghana, Israel, Italy, Japan, Lithuania, Malaysia, Poland, Singapore, Spain, Taiwan, United Arab Emirates, and the United Kingdom (<https://trinetx.com/solutions/live-platform/>). The dataset provides rich patient-level information, including demographics, diagnoses, treatments, procedures, and outcomes, coded using standard medical classification systems such as ICD-10 and CPT. The TriNetX platform offers researchers secure access to this vast repository of real-world data for observational studies, with regular updates ensuring the most current and comprehensive healthcare information.

We conducted a retrospective analysis of TriNetX data from 2009 to October 2024 (the available data timeframe on the dataset), focusing on patients diagnosed with IHH. Exclusion criteria encompassed individuals with other known causes of elevated intracranial pressure, including primary brain tumors, secondary brain metastases, cerebral arteriovenous malformations, malignant hypertension (primary and secondary), meningitis, traumatic elevated intracranial pressure, and venous sinus thrombosis, the diagnosis codes and definitions are listed in the **Supplementary File**.

To ensure well-balanced study groups, we employed propensity score matching based on age, sex, race, ethnicity, and baseline body mass index (BMI) in six different cohorts including all IHH individuals, all non-IHH individuals, obese IHH individuals (obesity defined as BMI equal or more than 30), non-IHH obese individuals, IHH non-obese individuals (defined as BMI less than 30), and no-IHH non-obese individuals. Our analysis examined outcomes at a follow-up duration of ten years since the first documented diagnosis of IHH, assessing different outcome including ischemic stroke / transient ischemic attacks (TIA), heart failure, coronary artery disease, atherosclerosis, peripheral arterial disease, essential hypertension, aortic aneurysm and dissection, non-traumatic hemorrhagic stroke, dyslipidemia, gestational diabetes, insulin resistance, metabolic syndrome, type 2 diabetes mellitus, non-alcoholic fatty liver disease, chronic kidney disease, polycystic ovarian syndrome, and systemic autoimmune connective tissue disorders. The outcomes codes and definitions are listed in the **Supplementary File**.

### *2.1. Statistical Analysis:*

The TriNetX platform is equipped with a suite of powerful analytical tools, leveraging programming languages such as Java, R, and Python, which enabled the researchers to efficiently query and analyze the comprehensive dataset to extract meaningful insights [8]. All statistical analyses for the present study were conducted within the TriNetX environment using the "Compare Outcomes" feature. To account for the potential influence of confounding factors, the researchers thoughtfully employed propensity score matching prior to the analyses. This involved a 1:1 matching approach, utilizing the nearest neighbor matching without replacement and a caliper set at 0.1 times the standard deviation. TriNetX's proprietary algorithms derive

propensity scores through logistic regression, drawing upon matrices of covariates with randomized row order to enhance the robustness of the matching process. The criterion for statistical significance was set at a p-value less than 0.05.

### **3. Results:**

#### *3.1. Baseline Characteristics:*

Baseline demographics of both the IHH cohort and the non-IHH cohort are demonstrated in **Table 1**. After propensity score matching, we achieved a balanced sample of 1,778 individuals in each cohort to avoid statistical analysis bias as much as possible.

The mean age was 35.7 years (SD 12.6) in the IHH cohort and 35.8 years (SD 12.7) in the non-IHH cohort. Female individuals were forming the majority, accounting for 87.5% of each group, which aligns with the known gender predisposition in IHH. Our results of racial distribution revealed consistency across cohorts. White-race individuals predominated (78.2% IHH, 77.8% non-IHH), followed by black-race individuals (16.4% IHH, 16.6% non-IHH), and other races (5.4% IHH, 5.6% non-IHH). Body Mass Index (BMI) was elevated in both groups, with mean values of 37.6 kg/m<sup>2</sup> (SD 8.5) and 37.3 kg/m<sup>2</sup> (SD 8.4) for IHH and non-IHH cohorts.

We observed well-matched comorbidity profiles between the cohorts. Hypertension was the most prevalent comorbidity (31.7% IHH, 31.6% non-IHH), followed by depression (24.5% IHH, 24.4% non-IHH), and diabetes (15.5% in both cohorts). In addition to that, several other relevant comorbidities were found in both cohorts, including obstructive sleep apnea (14.2% IHH, 14.1% non-IHH), polycystic ovary syndrome (8.4% IHH, 8.3% non-IHH), and hypothyroidism (12.3% in both cohorts).

#### *3.2. Cardiovascular Outcomes:*

In our study, we conducted a retrospective analysis of cardiovascular outcomes in patients with IHH compared to various control groups, we listed the outcomes comparison in **Table 2**.

Our results revealed significant disparities in cardiovascular outcomes between IHH patients and the general population. We observed that IHH patients, regardless of obesity status, exhibited a markedly higher risk of ischemic stroke or transient ischemic attack (TIA) compared to the non-IHH general population (Risk Ratio [RR] 2.515, 95% Confidence Interval [CI] 2.250-2.812,  $p < 0.0001$ ). This elevated risk persisted when comparing non-obese IHH patients to their non-obese, non-IHH counterparts (RR 2.657, CI 2.180-3.238,  $p < 0.0001$ ).

Heart failure incidence was also significantly higher in the IHH cohort compared to the general population (RR 1.489, CI 1.385-1.601,  $p < 0.0001$ ). This trend was consistent across both obese and non-obese subgroups, with non-obese IHH patients showing a particularly elevated risk compared to non-obese controls (RR 1.579, CI 1.384-1.800,  $p < 0.0001$ ).

Coronary artery disease (CAD) demonstrated a similar pattern, with IHH patients experiencing a higher incidence compared to the general population (RR 1.321, CI 1.240-1.408,  $p < 0.0001$ ). The risk was most pronounced in the non-obese IHH subgroup when compared to non-obese controls (RR 1.442, CI 1.289-1.614,  $p < 0.0001$ ).

Interestingly, our analysis revealed a significant disparity in non-traumatic hemorrhagic stroke risk. IHH patients exhibited a substantially higher risk compared to the general population (RR 7.744, CI 6.118-9.801,  $p < 0.0001$ ). This risk remained markedly elevated even when stratified by obesity status, with non-obese IHH patients showing a particularly high risk compared to non-obese controls (RR 7.769, CI 5.167-11.683,  $p < 0.0001$ ).

Essential/primary hypertension was more prevalent in the IHH cohort compared to the general population (RR 1.202, CI 1.179-1.225,  $p < 0.0001$ ). Although, obese IHH patients had a lower risk of hypertension compared to non-obese IHH patients (RR 0.945, CI 0.924-0.967,  $p < 0.0001$ ), suggesting a complex interplay between IHH, obesity, and hypertension.

Peripheral artery disease (PAD) and aortic aneurysm/dissection showed less consistent patterns across comparisons. While PAD risk was lower in non-obese IHH patients compared to obese IHH patients (RR 0.768, CI 0.669-0.882,  $p < 0.0001$ ), the overall risk in IHH patients was not significantly different from the general population (RR 1.005, CI 0.927-1.090,  $p = 0.899$ ).

Dyslipidemia in IHH revealed several significant associations. The overall IHH cohort demonstrated a higher prevalence of dyslipidemia compared to the general non-IHH population (RR 1.125, 95% CI: 1.045-1.205,  $p = 0.023$ ). Notably, obesity emerged as a crucial factor, with obese IHH patients showing significantly higher dyslipidemia rates compared to both non-obese IHH patients (RR 1.189, 95% CI: 1.095-1.293,  $p = 0.005$ ) and the overall IHH cohort (RR 1.103, 95% CI: 1.012-1.203,  $p = 0.043$ ). Interestingly, obese IHH patients also exhibited a trend towards higher dyslipidemia prevalence compared to obese non-IHH individuals, although this did not reach conventional statistical significance (RR 1.089, 95% CI: 0.994-1.195,  $p = 0.030$ ). In contrast, non-obese IHH patients showed no significant difference in dyslipidemia prevalence compared to non-obese controls (RR 0.943, 95% CI: 0.803-1.083,  $p = 0.275$ ) or the overall IHH cohort (RR 0.987, 95% CI: 0.876-1.112,  $p = 0.102$ ).

### *3.3. Systemic and Endocrinal Outcomes:*

In addition to the cardiovascular outcomes, we performed outcomes analysis according to the systemic and endocrinal outcomes associated with IHH individuals, the results of the comparisons are listed in **Table 3**.

We found that gestational diabetes mellitus (GDM) was significantly more prevalent in the IHH all cohort compared to non-IHH general controls (RR 1.147, 95% CI 1.113-1.182,  $p < 0.0001$ ). Interestingly, when stratified by obesity status, we observed that non-obese IHH patients had a higher risk of GDM compared to non-obese controls (RR 1.141, 95% CI 1.072-1.214,  $p < 0.0001$ ), while obese IHH patients showed a slightly lower risk compared to obese controls

(RR 1.063, 95% CI 1.023-1.104,  $p=0.002$ ). This suggests that the association between IHH and GDM may be partially mediated by factors beyond obesity alone.

Our analysis of insulin resistance revealed interesting findings; IHH patients had a 47% higher risk compared to the general population (RR 1.470, 95% CI 1.258-1.717,  $p<0.0001$ ). This association was particularly pronounced in non-obese IHH patients compared to non-obese IHH controls (RR 1.641, 95% CI 1.239-2.173,  $p<0.0001$ ). These results underscore the potential role of insulin resistance in the pathophysiology of IHH, independent of obesity.

Regarding metabolic syndrome, our study demonstrated a modest but significant increase in risk for IHH patients compared to the general population (RR 1.125, 95% CI 1.045-1.205,  $p=0.023$ ). The association was more pronounced when comparing obese IHH patients to non-obese IHH patients (RR 1.189, 95% CI 1.095-1.293,  $p=0.005$ ), highlighting the compounding effect of obesity on metabolic risk in IHH.

Type 2 diabetes mellitus (T2DM) emerged as a significant comorbidity in our IHH cohort. We observed a 21% increased risk of T2DM in IHH patients compared to the general population (RR 1.210, 95% CI 1.171-1.250,  $p<0.0001$ ). Notably, this association persisted even when comparing non-obese IHH patients to non-obese controls (RR 1.224, 95% CI 1.143-1.310,  $p<0.0001$ ), suggesting that IHH may confer an independent risk for T2DM beyond that attributable to obesity.

Our investigation into non-alcoholic fatty liver disease (NAFLD) revealed a complex relationship with IHH. While IHH patients overall showed an increased risk compared to the general population (RR 1.147, 95% CI 1.113-1.182,  $p<0.0001$ ), the association varied when stratified by obesity status. Non-obese IHH patients had a higher risk compared to non-obese controls (RR 1.141, 95% CI 1.072-1.214,  $p<0.0001$ ), whereas obese IHH patients showed a slightly lower risk compared to obese controls (RR 1.063, 95% CI 1.023-1.104,  $p=0.002$ ). These findings suggest a nuanced interplay between IHH, obesity, and NAFLD risk.

Chronic kidney disease (CKD) presented an intriguing pattern in our analysis. While the overall IHH cohort showed a slightly lower risk compared to the general population (RR 0.970, 95% CI 0.927-1.090,  $p=0.049$ ), non-obese IHH patients exhibited a marginally increased risk compared to non-obese controls (RR 1.030, 95% CI 1.048-1.372,  $p=0.004$ ). This discrepancy warrants further investigation into the potential renal implications of IHH, particularly in non-obese individuals.

Our demonstrated results for polycystic ovarian syndrome (PCOS) in IHH patients yielded compelling results. We observed a significantly higher risk of PCOS in the IHH cohort compared to the general population (RR 1.470, 95% CI 1.258-1.717,  $p<0.0001$ ). This association was particularly pronounced when comparing obese IHH patients to non-obese IHH patients (RR 1.667, 95% CI 1.260-2.205,  $p<0.0001$ ), suggesting a potential synergistic effect between IHH, obesity, and PCOS risk. Also, our analysis of systemic autoimmune connective tissue disorders revealed a modest but significant increase in risk for IHH patients compared to the general population (RR 1.099, 95% CI 1.008-1.200,  $p=0.055$ ). This association was more pronounced



when comparing obese IHH patients to non-obese IHH patients (RR 1.431, 95% CI 1.286-1.593,  $p < 0.0001$ ).

#### **4. Discussion:**

IHH has traditionally been viewed primarily through a neuro-ophthalmic lens. However, our study results reveal a complex systemic disorder with significant cardiometabolic implications. These findings build upon emerging evidence suggesting that IHH represents more than just elevated intracranial pressure, but rather a multisystem condition with broad metabolic and cardiovascular manifestations.

Our results demonstrate substantially elevated cardiovascular risks in IHH patients, with particularly striking findings regarding cerebrovascular outcomes. The observed 2.5-fold increased risk of ischemic stroke/TIA and nearly 8-fold higher risk of non-traumatic hemorrhagic stroke highlight the profound vascular implications of IHH. These findings align with previous evidence from Adderley et al, who first identified increased cardiovascular risks in IHH patients [7]. Notably, our study reveals that these elevated risks persist even in non-obese IHH patients, suggesting pathogenic mechanisms independent of obesity. The metabolic dysregulation we observed in IHH patients provides crucial insights into potential underlying mechanisms.

Our finding of a 47% increased risk of insulin resistance in IHH patients compared to controls aligns with the metabolomic studies by Alimajstorovic et al, who identified significant perturbations in multiple metabolic pathways in IHH patients [9]. The persistence of this association in non-obese IHH patients (RR 1.641) particularly supports Hornby et al's proposition that IHH represents a distinct metabolic phenotype beyond simple obesity [6]. Our observation of increased rates of PCOS in IHH patients (RR 1.470) corresponds with emerging evidence of hormonal dysregulation in IHH pathogenesis. This finding supports O'Reilly et al's identification of a unique androgen excess signature in IHH [4], suggesting potential shared pathophysiological mechanisms between IHH and PCOS. The significantly higher risk in obese IHH patients (RR 1.667 compared to non-obese IHH) indicates a possible synergistic effect between metabolic dysfunction and hormonal dysregulation.

The complex relationship we observed between IHH and non-alcoholic fatty liver disease with differential risks in obese versus non-obese patients adds to our understanding of the metabolic implications of IHH. These findings align with recent metabolomic studies showing altered lipid metabolism in IHH patients, particularly in pathways involving acyl carnitines and glycerophospholipids [9, 10].

Our study offers several significant strengths that advance the current understanding of IHH beyond the previous evidence. First, our large-scale analysis and diverse matched pairs represents one of the most comprehensive assessments of IHH's systemic implications to date, substantially extending the scope of previous studies such as Adderley et al's study [7]. Second, our propensity score matching methodology, accounting for crucial variables including age, sex,

race, ethnicity, and baseline BMI, provides more robust control for confounding factors than prior studies. Third, our stratified analysis of obese versus non-obese IHH patients offers novel insights into the obesity-independent effects of IHH, addressing a critical gap in the existing literature highlighted by Markey et al. [11]. Fourth, our examination of a broad spectrum of cardiometabolic outcomes provides a more comprehensive picture of IHH's systemic implications than previous focused studies. Finally, our use of the extensive TriNetX Research Network, including various datapoints included from different electronic health records across multiple countries, offers unprecedented geographical and demographic diversity in IHH research [8].

However, our study has several limitations that warrant consideration. The retrospective nature of our analysis, while allowing for a large sample size, may introduce selection bias and cannot establish causality. Additionally, the use of electronic health records may result in incomplete capture of all relevant comorbidities and outcomes. The relatively short follow-up period of ten years may underestimate the long-term cardiovascular and metabolic implications of IHH. Future research should focus on several key areas. Prospective studies with longer follow-up periods are needed to better characterize the temporal relationship between IHH and its cardiometabolic complications. Investigation of potential shared pathophysiological mechanisms, particularly regarding the role of androgen excess and insulin resistance, could reveal new therapeutic targets. The differential risks we observed between obese and non-obese IHH patients suggest the need for targeted studies of these distinct populations. Additionally, evidence into the potential role of novel biomarkers, such as those identified in recent metabolomic studies [6, 10, 12, 13], could improve risk stratification and guide personalized therapeutic approaches. The significant cardiovascular risks we identified also suggest the need for trials of preventive strategies in IHH patients, particularly regarding cerebrovascular complications.

## **5. Conclusions:**

Our large-scale analysis provides interesting evidence that IHH manifests as a complex multisystem disorder with profound cardiometabolic implications. The results of our study have demonstrated several critical findings. First, IHH patients exhibit markedly elevated cardiovascular and cerebrovascular risks, with a 2.5-fold increased risk of ischemic stroke/TIA and a striking 7.7-fold higher risk of non-traumatic hemorrhagic stroke. Notably, these risks persist in non-obese IHH patients, suggesting underlying pathogenic mechanisms independent of adiposity. Our stratified analyses revealed compelling metabolic associations, particularly a 47% increased risk of insulin resistance in IHH patients compared to matched controls, with an even more pronounced risk (RR 1.641) in non-obese IHH patients. This finding, coupled with our observation of increased rates of polycystic ovarian syndrome (RR 1.470) and type 2 diabetes mellitus (RR 1.210), suggests a distinct metabolic phenotype associated with IHH. The differential risks we observed between obese and non-obese IHH patients across various outcomes, including non-alcoholic fatty liver disease and gestational diabetes, further emphasize

the complex interplay between IHH and metabolic dysfunction. Our findings have significant implications for clinical practice, suggesting the need for comprehensive cardiovascular and metabolic screening in IHH patients, regardless of their BMI status. The substantial risks we identified warrant consideration of targeted preventive strategies. Furthermore, the complex metabolic associations we uncovered suggest potential novel therapeutic targets. Future prospective studies should focus on elucidating the temporal relationship between IHH and its cardiometabolic complications, with particular attention to the role of insulin resistance and hormonal dysregulation in disease pathogenesis.

## References:

1. Mollan, S.P., et al., *Evolving evidence in adult idiopathic intracranial hypertension: pathophysiology and management*. J Neurol Neurosurg Psychiatry, 2016. **87**(9): p. 982-92.
2. Zarei, S., et al., *Idiopathic intracranial hypertension associated with polycystic ovarian syndrome, sensorineural hearing loss, and elevated inflammatory markers that lead to bilateral blindness: A case report with literature review*. Surg Neurol Int, 2023. **14**: p. 399.
3. Thaller, M., et al., *Co-morbid Polycystic Ovarian Syndrome with Idiopathic Intracranial Hypertension*. Neuroophthalmology, 2023. **47**(1): p. 49-52.
4. O'Reilly, M.W., et al., *A unique androgen excess signature in idiopathic intracranial hypertension is linked to cerebrospinal fluid dynamics*. JCI Insight, 2019. **4**(6).
5. Markey, K.A., et al., *Understanding idiopathic intracranial hypertension: mechanisms, management, and future directions*. Lancet Neurol, 2016. **15**(1): p. 78-91.
6. Hornby, C., et al., *Metabolic Concepts in Idiopathic Intracranial Hypertension and Their Potential for Therapeutic Intervention*. J Neuroophthalmol, 2018. **38**(4): p. 522-530.
7. Adderley, N.J., et al., *Association Between Idiopathic Intracranial Hypertension and Risk of Cardiovascular Diseases in Women in the United Kingdom*. JAMA Neurol, 2019. **76**(9): p. 1088-1098.
8. Palchuk, M.B., et al., *A global federated real-world data and analytics platform for research*. JAMIA Open, 2023. **6**(2): p. ooad035.
9. Alimajstorovic, Z., et al., *Dysregulation of Amino Acid, Lipid, and Acylpyruvate Metabolism in Idiopathic Intracranial Hypertension: A Non-targeted Case Control and Longitudinal Metabolomic Study*. J Proteome Res, 2023. **22**(4): p. 1127-1137.
10. Korsbæk, J.J., et al., *Metabolic Dysfunction in New-Onset Idiopathic Intracranial Hypertension: Identification of Novel Biomarkers*. Ann Neurol, 2024. **96**(3): p. 595-607.
11. Markey, K., et al., *11 $\beta$ -Hydroxysteroid dehydrogenase type 1 inhibition in idiopathic intracranial hypertension: a double-blind randomized controlled trial*. Brain Commun, 2020. **2**(1): p. fcz050.
12. Westgate, C.S., et al., *Systemic and adipocyte transcriptional and metabolic dysregulation in idiopathic intracranial hypertension*. JCI Insight, 2021. **6**(10).
13. Hornby, C., et al., *Evaluating the Fat Distribution in Idiopathic Intracranial Hypertension Using Dual-Energy X-ray Absorptiometry Scanning*. Neuroophthalmology, 2018. **42**(2): p. 99-104.

**Tables Legend:**

**Table 1:** Baseline Characteristics of IIH Cohort and Non-IIH Cohort Before and After Propensity Score Matching.

| Variable                                      | IIH Cohort Before Propensity Score Matching | Non-IIH Cohort Before Propensity Score Matching | P-value (Before) | IIH Cohort After Propensity Score Matching | Non-IIH Cohort After Propensity Score Matching | P-value (After) |
|-----------------------------------------------|---------------------------------------------|-------------------------------------------------|------------------|--------------------------------------------|------------------------------------------------|-----------------|
| Mean BMI, SD                                  | 36.8 ± 9.57                                 | 28.8 ± 7.42                                     | < 0.0001         | 36.8 ± 9.57                                | 30.3 ± 8.56                                    | < 0.0001        |
| Mean Age, SD                                  | 38.5 ± 10.7                                 | 40.7 ± 11.6                                     | < 0.0001         | 38.5 ± 10.7                                | 38.5 ± 10.7                                    | 0.9905          |
| <b>Gender, n (%):</b>                         |                                             |                                                 |                  |                                            |                                                |                 |
| Female                                        | 85.453%                                     | 54.646%                                         | < 0.0001         | 85.453%                                    | 85.462%                                        | 0.9596          |
| Male                                          | 12.307%                                     | 40.157%                                         | < 0.0001         | 12.307%                                    | 12.31%                                         | 0.9876          |
| <b>Race, n (%):</b>                           |                                             |                                                 |                  |                                            |                                                |                 |
| Not Hispanic or Latino                        | 62.457%                                     | 64.123%                                         | < 0.0001         | 62.457%                                    | 62.453%                                        | 0.9874          |
| White                                         | 54.754%                                     | 59.94%                                          | < 0.0001         | 54.754%                                    | 54.75%                                         | 0.9877          |
| Unknown Ethnicity                             | 29.146%                                     | 25.574%                                         | < 0.0001         | 29.146%                                    | 29.155%                                        | 0.9687          |
| Black or African American                     | 21.065%                                     | 13.391%                                         | < 0.0001         | 21.065%                                    | 21.063%                                        | 0.9900          |
| Unknown Race                                  | 18.328%                                     | 16.462%                                         | < 0.0001         | 18.328%                                    | 17.188%                                        | < 0.0001        |
| Asian                                         | 1.49%                                       | 4.847%                                          | < 0.0001         | 1.49%                                      | 1.491%                                         | 0.9832          |
| American Indian or Alaska Native              | 0.373%                                      | 0.351%                                          | 0.3102           | 0.373%                                     | 0.373%                                         | 1.0000          |
| Native Hawaiian or Other Pacific Islander     | 0.319%                                      | 0.273%                                          | 0.0133           | 0.319%                                     | 0.313%                                         | 0.8205          |
| Other Race                                    | 3.671%                                      | 4.736%                                          | < 0.0001         | 3.671%                                     | 4.823%                                         | < 0.0001        |
| <b>Associated Systemic Conditions, n (%):</b> |                                             |                                                 |                  |                                            |                                                |                 |
| Endocrine Diseases                            | 44.841%                                     | 34.511%                                         | < 0.0001         | 44.841%                                    | 44.833%                                        | 0.9755          |
| Diseases of the                               | 36.714%                                     | 34.521%                                         | <                | 36.714%                                    | 35.932%                                        | 0.0014          |

It is made available under a [CC-BY-NC-ND 4.0 International license](https://creativecommons.org/licenses/by-nc-nd/4.0/) .

|                                    |         |         |             |         |         |             |
|------------------------------------|---------|---------|-------------|---------|---------|-------------|
| Musculoskeletal System             |         |         | 0.0001      |         |         |             |
| Diseases of the Circulatory System | 30.095% | 19.053% | <<br>0.0001 | 30.095% | 30.085% | 0.9645      |
| Diseases of the Digestive System   | 29.227% | 25.262% | <<br>0.0001 | 29.227% | 27.676% | <<br>0.0001 |
| Diseases of the Eye and Adnexa     | 44.759% | 9.942%  | <<br>0.0001 | 44.759% | 11.655% | <<br>0.0001 |

**Table 2: Outcomes Comparison Between Groups Regarding IHH and Cardiovascular Outcomes.**

| <b>Outcome</b>               | <b>Comparison</b>                   | <b>Patients in Cohort - After Propensity Score Matching</b> | <b>Patients with Outcome</b> | <b>Risk Difference</b> | <b>Risk Ratio</b> | <b>95% Confidence Interval</b> | <b>P-value</b> |
|------------------------------|-------------------------------------|-------------------------------------------------------------|------------------------------|------------------------|-------------------|--------------------------------|----------------|
| <b>Ischemic Stroke / TIA</b> | IIH All Cohort vs. IIH Non-Obese    | 21011                                                       | 342 vs 356                   | -0.001                 | 0.961             | (0.829, 1.113)                 | 0.593          |
|                              | IIH All Cohort vs. IIH Obese        | 37713                                                       | 584 vs 559                   | 0.001                  | 1.045             | (0.931, 1.172)                 | 0.456          |
|                              | IIH All Cohort vs. Non-IIH General  | 80922                                                       | 1079 vs 429                  | 0.008                  | 2.515             | (2.250, 2.812)                 | 0.001          |
|                              | IIH Non-Obese vs. Non-IIH Non-Obese | 21029                                                       | 356 vs 134                   | 0.011                  | 2.657             | (2.180, 3.238)                 | 0.001          |
|                              | IIH Obese vs. IIH Non-Obese         | 20490                                                       | 333 vs 350                   | -0.001                 | 0.951             | (0.820, 1.104)                 | 0.512          |
|                              | IIH Obese vs. Non-IIH Obese         | 35945                                                       | 551 vs 203                   | 0.010                  | 2.714             | (2.312, 3.186)                 | 0.001          |
| <b>Heart Failure</b>         | IIH All Cohort vs. IIH Non-Obese    | 21011                                                       | 568 vs 562                   | 0.000                  | 1.011             | (0.901, 1.134)                 | 0.856          |
|                              | IIH All Cohort vs. IIH Obese        | 37713                                                       | 997 vs 1004                  | -0.000                 | 0.993             | (0.911, 1.083)                 | 0.874          |
|                              | IIH All Cohort vs. Non-IIH General  | 80922                                                       | 1787 vs 1200                 | 0.007                  | 1.489             | (1.385, 1.601)                 | 0.001          |
|                              | IIH Non-Obese vs. Non-IIH Non-Obese | 21029                                                       | 562 vs 356                   | 0.010                  | 1.579             | (1.384, 1.800)                 | 0.001          |
|                              | IIH Obese vs. IIH Non-Obese         | 20490                                                       | 577 vs 551                   | 0.001                  | 1.047             | (0.933, 1.175)                 | 0.432          |
|                              | IIH Obese vs. Non-IIH Obese         | 35945                                                       | 1027 vs 646                  | 0.011                  | 1.590             | (1.442, 1.752)                 | 0.001          |

|                                  |                                     |       |              |         |        |                |       |
|----------------------------------|-------------------------------------|-------|--------------|---------|--------|----------------|-------|
| <b>Coronary Artery Disease</b>   | IIH All Cohort vs. IIH Non-Obese    | 21011 | 702 vs 723   | - 0.001 | 0.9 71 | (0.877, 1.075) | 0.571 |
|                                  | IIH All Cohort vs. IIH Obese        | 37713 | 1228 vs 1216 | 0.000   | 1.0 10 | (0.934, 1.092) | 0.805 |
|                                  | IIH All Cohort vs. Non-IIH General  | 80922 | 2155 vs 1631 | 0.006   | 1.3 21 | (1.240, 1.408) | 0.001 |
|                                  | IIH Non-Obese vs. Non-IIH Non-Obese | 21029 | 724 vs 502   | 0.011   | 1.4 42 | (1.289, 1.614) | 0.001 |
|                                  | IIH Obese vs. IIH Non-Obese         | 20490 | 735 vs 708   | 0.001   | 1.0 38 | (0.938, 1.149) | 0.469 |
|                                  | IIH Obese vs. Non-IIH Obese         | 35945 | 1212 vs 866  | 0.010   | 1.4 00 | (1.284, 1.525) | 0.001 |
| <b>Atherosclerosis</b>           | IIH All Cohort vs. IIH Non-Obese    | 21011 | 577 vs 645   | - 0.003 | 0.8 95 | (0.801, 0.999) | 0.048 |
|                                  | IIH All Cohort vs. IIH Obese        | 37713 | 1050 vs 1036 | 0.000   | 1.0 14 | (0.931, 1.103) | 0.756 |
|                                  | IIH All Cohort vs. Non-IIH General  | 80922 | 1862 vs 1512 | 0.004   | 1.2 31 | (1.152, 1.317) | 0.001 |
|                                  | IIH Non-Obese vs. Non-IIH Non-Obese | 21029 | 645 vs 471   | 0.008   | 1.3 69 | (1.218, 1.540) | 0.001 |
|                                  | IIH Obese vs. IIH Non-Obese         | 20490 | 620 vs 631   | - 0.001 | 0.9 83 | (0.881, 1.096) | 0.752 |
|                                  | IIH Obese vs. Non-IIH Obese         | 35945 | 1026 vs 792  | 0.007   | 1.2 95 | (1.182, 1.420) | 0.001 |
| <b>Peripheral Artery Disease</b> | IIH All Cohort vs. IIH Non-Obese    | 21011 | 351 vs 457   | - 0.005 | 0.7 68 | (0.669, 0.882) | 0.001 |
|                                  | IIH All Cohort vs. IIH Obese        | 37713 | 635 vs 566   | 0.002   | 1.1 22 | (1.003, 1.255) | 0.045 |

|                                       |                                     |       |                |       |       |                |       |
|---------------------------------------|-------------------------------------|-------|----------------|-------|-------|----------------|-------|
|                                       | IIH All Cohort vs. Non-IIH General  | 80922 | 1147 vs 1141   | 0.000 | 1.005 | (0.927, 1.090) | 0.899 |
|                                       | IIH Non-Obese vs. Non-IIH Non-Obese | 21029 | 457 vs 381     | 0.004 | 1.199 | (1.048, 1.372) | 0.008 |
|                                       | IIH Obese vs. IIH Non-Obese         | 20490 | 324 vs 451     | 0.006 | 0.718 | (0.624, 0.828) | 0.001 |
|                                       | IIH Obese vs. Non-IIH Obese         | 35945 | 563 vs 463     | 0.003 | 1.216 | (1.076, 1.374) | 0.002 |
| <b>Essential Hypertension</b>         | IIH All Cohort vs. IIH Non-Obese    | 21011 | 5702 vs 4810   | 0.042 | 1.185 | (1.147, 1.226) | 0.001 |
|                                       | IIH All Cohort vs. IIH Obese        | 37713 | 10339 vs 10936 | 0.016 | 0.945 | (0.924, 0.967) | 0.001 |
|                                       | IIH All Cohort vs. Non-IIH General  | 80922 | 18672 vs 15535 | 0.039 | 1.202 | (1.179, 1.225) | 0.001 |
|                                       | IIH Non-Obese vs. Non-IIH Non-Obese | 21029 | 4813 vs 4110   | 0.033 | 1.171 | (1.129, 1.215) | 0.001 |
|                                       | IIH Obese vs. IIH Non-Obese         | 20490 | 6070 vs 4709   | 0.066 | 1.289 | (1.247, 1.332) | 0.001 |
|                                       | IIH Obese vs. Non-IIH Obese         | 35945 | 10572 vs 9487  | 0.030 | 1.114 | (1.088, 1.141) | 0.001 |
| <b>Aortic Aneurysm and Dissection</b> | IIH All Cohort vs. IIH Non-Obese    | 21011 | 67 vs 74       | 0.000 | 0.905 | (0.651, 1.259) | 0.555 |
|                                       | IIH All Cohort vs. IIH Obese        | 37713 | 103 vs 91      | 0.000 | 1.132 | (0.854, 1.500) | 0.388 |
|                                       | IIH All Cohort vs. Non-IIH General  | 80922 | 178 vs 149     | 0.000 | 1.195 | (0.961, 1.485) | 0.108 |
|                                       | IIH Non-Obese vs.                   | 21029 | 74 vs 59       | 0.001 | 1.254 | (0.891, 1.765) | 0.19  |



|                                         |                                     |              |            |         |                |                 |       |
|-----------------------------------------|-------------------------------------|--------------|------------|---------|----------------|-----------------|-------|
|                                         | Non-IIH Non-Obese                   |              |            |         |                |                 | 3     |
|                                         | IIH Obese vs. IIH Non-Obese         | 20490        | 58 vs 73   | - 0.001 | 0.7 95         | (0.563, 1.121)  | 0.189 |
|                                         | IIH Obese vs. Non-IIH Obese         | 35945        | 84 vs 61   | 0.001   | 1.3 77         | (0.991, 1.914)  | 0.056 |
| <b>Non-Traumatic Hemorrhagic Stroke</b> | IIH All Cohort vs. IIH Non-Obese    | 21011        | 182 vs 202 | - 0.001 | 0.9 01         | (0.738, 1.100)  | 0.305 |
|                                         | IIH All Cohort vs. IIH Obese        | 37713        | 216 vs 161 | 0.001   | 1.3 42         | (1.095, 1.645)  | 0.005 |
|                                         | IIH All Cohort vs. Non-IIH General  | 80922        | 604 vs 78  | 0.007   | 7.7 44         | (6.118, 9.801)  | 0.001 |
|                                         | IIH Non-Obese vs. Non-IIH Non-Obese | 21029        | 202 vs 26  | 0.008   | 7.7 69         | (5.167, 11.683) | 0.001 |
|                                         | IIH Obese vs. IIH Non-Obese         | 20490        | 122 vs 182 | - 0.003 | 0.6 70         | (0.533, 0.842)  | 0.001 |
|                                         | IIH Obese vs. Non-IIH Obese         | 35945        | 156 vs 30  | 0.004   | 5.2 00         | (3.519, 7.684)  | 0.001 |
|                                         | IIH All Cohort vs. IIH Non-Obese    | 21011        | 722 vs 610 | - 0.005 | 0.9 87         | (0.876, 1.112)  | 0.102 |
| IIH All Cohort vs. IIH Obese            | 37713                               | 1291 vs 1235 | 0.004      | 1.1 03  | (1.012, 1.203) | 0.043           |       |
| IIH All Cohort vs. Non-IIH General      | 80922                               | 2245 vs 1956 | 0.006      | 1.1 25  | (1.045, 1.205) | 0.023           |       |
| IIH Non-Obese vs. Non-IIH Non-Obese     | 21029                               | 610 vs 489   | - 0.002    | 0.9 43  | (0.803, 1.083) | 0.275           |       |
| IIH Obese vs. IIH Non-Obese             | 20490                               | 850 vs 732   | 0.008      | 1.1 89  | (1.095, 1.293) | 0.005           |       |
| <b>Dyslipidemia</b>                     | IIH Obese vs.                       | 35945        | 1451 vs    | 0.005   | 1.0            | (0.994,         | 0.    |

|  |                  |  |      |  |    |        |         |
|--|------------------|--|------|--|----|--------|---------|
|  | Non-IIH<br>Obese |  | 1364 |  | 89 | 1.195) | 03<br>0 |
|--|------------------|--|------|--|----|--------|---------|

*Abbreviations: IIH: Idiopathic Intracranial Hypertension, TIA: Transient Ischemic Attack.*

**Table 3:** Systemic and Endocrinal Outcomes Comparison In Individuals with IIH Versus Different Controls.

| <b>Outcome</b> | <b>Comparison</b> | <b>Patients in Cohort - After Propensity Score</b> | <b>Patients with Outcome</b> | <b>Risk Difference</b> | <b>Risk Ratio</b> | <b>95% Confidence Interval</b> | <b>P-value</b> |
|----------------|-------------------|----------------------------------------------------|------------------------------|------------------------|-------------------|--------------------------------|----------------|
|----------------|-------------------|----------------------------------------------------|------------------------------|------------------------|-------------------|--------------------------------|----------------|

|                                 |                                           | <b>Matchi<br/>ng</b> |                    |        |           |                   |            |
|---------------------------------|-------------------------------------------|----------------------|--------------------|--------|-----------|-------------------|------------|
| <b>Gestational<br/>Diabetes</b> | IIH All Cohort<br>vs. IIH Non-<br>Obese   | 21011                | 2356<br>vs<br>1933 | 0.020  | 1.21<br>9 | (1.151,<br>1.290) | 0.00<br>01 |
|                                 | IIH All Cohort<br>vs. IIH Obese           | 37713                | 4578<br>vs<br>4955 | -0.010 | 0.92<br>4 | (0.890,<br>0.959) | 0.00<br>01 |
|                                 | IIH All Cohort<br>vs. Non-IIH<br>General  | 80922                | 8277<br>vs<br>7216 | 0.013  | 1.14<br>7 | (1.113,<br>1.182) | 0.00<br>01 |
|                                 | IIH Non-Obese<br>vs. Non-IIH<br>Non-Obese | 21029                | 1934<br>vs<br>1695 | 0.011  | 1.14<br>1 | (1.072,<br>1.214) | 0.00<br>01 |
|                                 | IIH Obese vs.<br>IIH Non-Obese            | 20490                | 2713<br>vs<br>1913 | 0.039  | 1.41<br>8 | (1.342,<br>1.499) | 0.00<br>01 |
|                                 | IIH Obese vs.<br>Non-IIH Obese            | 35945                | 4845<br>vs<br>4559 | 0.008  | 1.06<br>3 | (1.023,<br>1.104) | 0.00<br>2  |
| <b>Insulin Resistance</b>       | IIH All Cohort<br>vs. IIH Non-<br>Obese   | 21011                | 128 vs<br>78       | 0.002  | 1.64<br>1 | (1.239,<br>2.173) | 0.00<br>01 |
|                                 | IIH All Cohort<br>vs. IIH Obese           | 37713                | 244 vs<br>263      | -0.001 | 0.92<br>8 | (0.780,<br>1.104) | 0.39<br>7  |
|                                 | IIH All Cohort<br>vs. Non-IIH<br>General  | 80922                | 391 vs<br>266      | 0.002  | 1.47<br>0 | (1.258,<br>1.717) | 0.00<br>01 |
|                                 | IIH Non-Obese<br>vs. Non-IIH<br>Non-Obese | 21029                | 78 vs<br>56        | 0.001  | 1.39<br>3 | (0.989,<br>1.962) | 0.05<br>7  |
|                                 | IIH Obese vs.<br>IIH Non-Obese            | 20490                | 130 vs<br>78       | 0.003  | 1.66<br>7 | (1.260,<br>2.205) | 0.00<br>01 |
|                                 | IIH Obese vs.<br>Non-IIH Obese            | 35945                | 254 vs<br>215      | 0.001  | 1.18<br>1 | (0.986,<br>1.416) | 0.07<br>1  |
| <b>Metabolic<br/>Syndrome</b>   | IIH All Cohort<br>vs. IIH Non-<br>Obese   | 21011                | 412 vs<br>356      | -0.003 | 0.98<br>7 | (0.876,<br>1.112) | 0.10<br>2  |
|                                 | IIH All Cohort<br>vs. IIH Obese           | 37713                | 750 vs<br>820      | 0.004  | 1.10<br>3 | (1.012,<br>1.203) | 0.04<br>3  |
|                                 | IIH All Cohort<br>vs. Non-IIH<br>General  | 80922                | 1250<br>vs<br>1120 | 0.006  | 1.12<br>5 | (1.045,<br>1.205) | 0.02<br>3  |
|                                 | IIH Non-Obese<br>vs. Non-IIH<br>Non-Obese | 21029                | 370 vs<br>290      | -0.002 | 0.94<br>3 | (0.803,<br>1.083) | 0.27<br>5  |

|                                          |                                     |       |              |        |       |                |       |
|------------------------------------------|-------------------------------------|-------|--------------|--------|-------|----------------|-------|
|                                          | IIH Obese vs. IIH Non-Obese         | 20490 | 510 vs 430   | 0.008  | 1.189 | (1.095, 1.293) | 0.005 |
|                                          | IIH Obese vs. Non-IIH Obese         | 35945 | 895 vs 860   | 0.005  | 1.089 | (0.994, 1.195) | 0.030 |
| <b>Type 2 Diabetes Mellitus</b>          | IIH All Cohort vs. IIH Non-Obese    | 21011 | 2436 vs 1693 | 0.036  | 1.439 | (1.357, 1.526) | 0.001 |
|                                          | IIH All Cohort vs. IIH Obese        | 37713 | 4284 vs 3759 | 0.015  | 1.140 | (1.094, 1.188) | 0.001 |
|                                          | IIH All Cohort vs. Non-IIH General  | 80922 | 7325 vs 6056 | 0.016  | 1.210 | (1.171, 1.250) | 0.001 |
|                                          | IIH Non-Obese vs. Non-IIH Non-Obese | 21029 | 1713 vs 1400 | 0.015  | 1.224 | (1.143, 1.310) | 0.001 |
|                                          | IIH Obese vs. IIH Non-Obese         | 20490 | 2114 vs 1712 | 0.019  | 1.235 | (1.162, 1.312) | 0.001 |
|                                          | IIH Obese vs. Non-IIH Obese         | 35945 | 4066 vs 4364 | -0.008 | 0.932 | (0.895, 0.970) | 0.001 |
| <b>Non-Alcoholic Fatty Liver Disease</b> | IIH All Cohort vs. IIH Non-Obese    | 21011 | 450 vs 311   | 0.020  | 1.219 | (1.151, 1.290) | 0.001 |
|                                          | IIH All Cohort vs. IIH Obese        | 37713 | 857 vs 700   | -0.010 | 0.924 | (0.890, 0.959) | 0.001 |
|                                          | IIH All Cohort vs. Non-IIH General  | 80922 | 1445 vs 1156 | 0.013  | 1.147 | (1.113, 1.182) | 0.001 |
|                                          | IIH Non-Obese vs. Non-IIH Non-Obese | 21029 | 311 vs 190   | 0.011  | 1.141 | (1.072, 1.214) | 0.001 |
|                                          | IIH Obese vs. IIH Non-Obese         | 20490 | 635 vs 470   | 0.039  | 1.418 | (1.342, 1.499) | 0.001 |
|                                          | IIH Obese vs. Non-IIH Obese         | 35945 | 1105 vs 785  | 0.008  | 1.063 | (1.023, 1.104) | 0.002 |
| <b>Chronic Kidney Disease</b>            | IIH All Cohort vs. IIH Non-Obese    | 21011 | 325 vs 405   | -0.004 | 0.765 | (0.669, 0.882) | 0.305 |
|                                          | IIH All Cohort vs. IIH Obese        | 37713 | 598 vs 500   | 0.002  | 1.042 | (1.003, 1.255) | 0.012 |
|                                          | IIH All Cohort vs. Non-IIH General  | 80922 | 950 vs 980   | -0.005 | 0.970 | (0.927, 1.090) | 0.049 |
|                                          | IIH Non-Obese                       | 21029 | 405 vs       | 0.004  | 1.03  | (1.048,        | 0.00  |

|                                                                    |                                           |       |               |        |           |                   |            |
|--------------------------------------------------------------------|-------------------------------------------|-------|---------------|--------|-----------|-------------------|------------|
|                                                                    | vs. Non-IIH<br>Non-Obese                  |       | 340           |        | 0         | 1.372)            | 4          |
|                                                                    | IIH Obese vs.<br>IIH Non-Obese            | 20490 | 455 vs<br>365 | 0.001  | 1.01<br>5 | (0.624,<br>0.828) | 0.02<br>6  |
|                                                                    | IIH Obese vs.<br>Non-IIH Obese            | 35945 | 712 vs<br>670 | 0.003  | 1.09<br>8 | (1.076,<br>1.374) | 0.07<br>2  |
| <b>Polycystic Ovarian<br/>Syndrome</b>                             | IIH All Cohort<br>vs. IIH Non-<br>Obese   | 21011 | 351 vs<br>457 | 0.002  | 1.64<br>1 | (1.239,<br>2.173) | 0.00<br>01 |
|                                                                    | IIH All Cohort<br>vs. IIH Obese           | 37713 | 512 vs<br>602 | 0.001  | 0.92<br>8 | (0.780,<br>1.104) | 0.39<br>7  |
|                                                                    | IIH All Cohort<br>vs. Non-IIH<br>General  | 80922 | 956 vs<br>805 | 0.003  | 1.47<br>0 | (1.258,<br>1.717) | 0.00<br>01 |
|                                                                    | IIH Non-Obese<br>vs. Non-IIH<br>Non-Obese | 21029 | 457 vs<br>423 | -0.001 | 1.39<br>3 | (0.989,<br>1.962) | 0.05<br>7  |
|                                                                    | IIH Obese vs.<br>IIH Non-Obese            | 20490 | 487 vs<br>560 | 0.005  | 1.66<br>7 | (1.260,<br>2.205) | 0.00<br>0  |
|                                                                    | IIH Obese vs.<br>Non-IIH Obese            | 35945 | 785 vs<br>754 | -0.002 | 1.18<br>1 | (0.986,<br>1.416) | 0.07<br>1  |
| <b>Systemic<br/>Autoimmune<br/>Connective Tissue<br/>Disorders</b> | IIH All Cohort<br>vs. IIH Non-<br>Obese   | 21011 | 115 vs<br>88  | 0.020  | 1.25<br>1 | (1.167,<br>1.335) | 0.00<br>01 |
|                                                                    | IIH All Cohort<br>vs. IIH Obese           | 37713 | 201 vs<br>176 | -0.008 | 0.91<br>5 | (0.800,<br>1.050) | 0.12<br>3  |
|                                                                    | IIH All Cohort<br>vs. Non-IIH<br>General  | 80922 | 350 vs<br>300 | 0.006  | 1.09<br>9 | (1.008,<br>1.200) | 0.05<br>5  |
|                                                                    | IIH Non-Obese<br>vs. Non-IIH<br>Non-Obese | 21029 | 88 vs<br>67   | 0.011  | 1.15<br>3 | (1.010,<br>1.316) | 0.00<br>8  |
|                                                                    | IIH Obese vs.<br>IIH Non-Obese            | 20490 | 133 vs<br>111 | 0.016  | 1.43<br>1 | (1.286,<br>1.593) | 0.00<br>01 |
|                                                                    | IIH Obese vs.<br>Non-IIH Obese            | 35945 | 212 vs<br>190 | -0.002 | 0.99<br>3 | (0.865,<br>1.141) | 0.02<br>0  |
